# Supplementary material for: Maternal and Infant Histo-Blood Group Antigen (HBGA) Profiles and Their Influence on Oral Rotavirus Vaccine (RotarixTM) Immunogenicity among Infants in Zambia
Source: MDPI journal article supplement (doi:10.3390/vaccines11081303), 2023-07-31
Supplement: s1 [file s1]

## Supplementary information. Material and Methods

Table 1. Primer list for FUT2 genotyping

| Primer Name | Primer Sequence         |
|-------------|-------------------------|
| FUT2-FOR1   | CCATCTCCCAGCTAACGTGTCC  |
| FUT2-REV1   | GGGAGGCAGAGAAGGAGAAAAGG |

Note: FR1 = First Forward Primer; RV1 = First Reverse Primer; FOR1 = Forward primer; REV1 = Reverse Primer

### Key for interpretation of results

**FUT2 G428A genotypes are determined based on RFLP patterns:**

- Digestion into 3 fragments: 202 bp, 425 bp, and 498 bp was recorded as Genotype AA; *Non-secretor*
- Digestion into 4 fragments: 202 bp, 295 bp, 130 bp and 498 bp was recorded as Genotype GG; *Homozygous secretor*
- Digestion into 5 fragments: 202 bp, 295 bp, 130 bp, 425 bp and 498 bp was recorded as Genotype GA; *Heterozygous secretor*

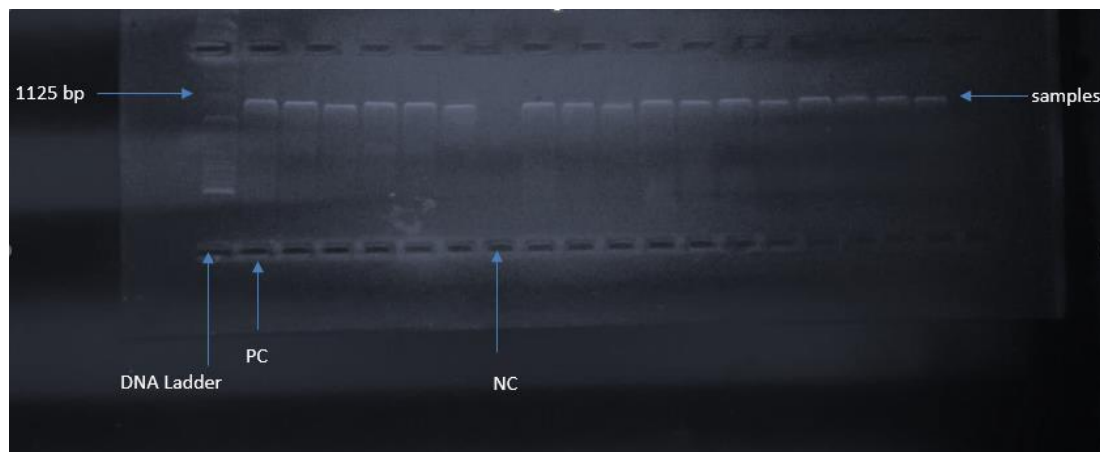

Figure 1. FUT2 Amplicons on Agarose gel

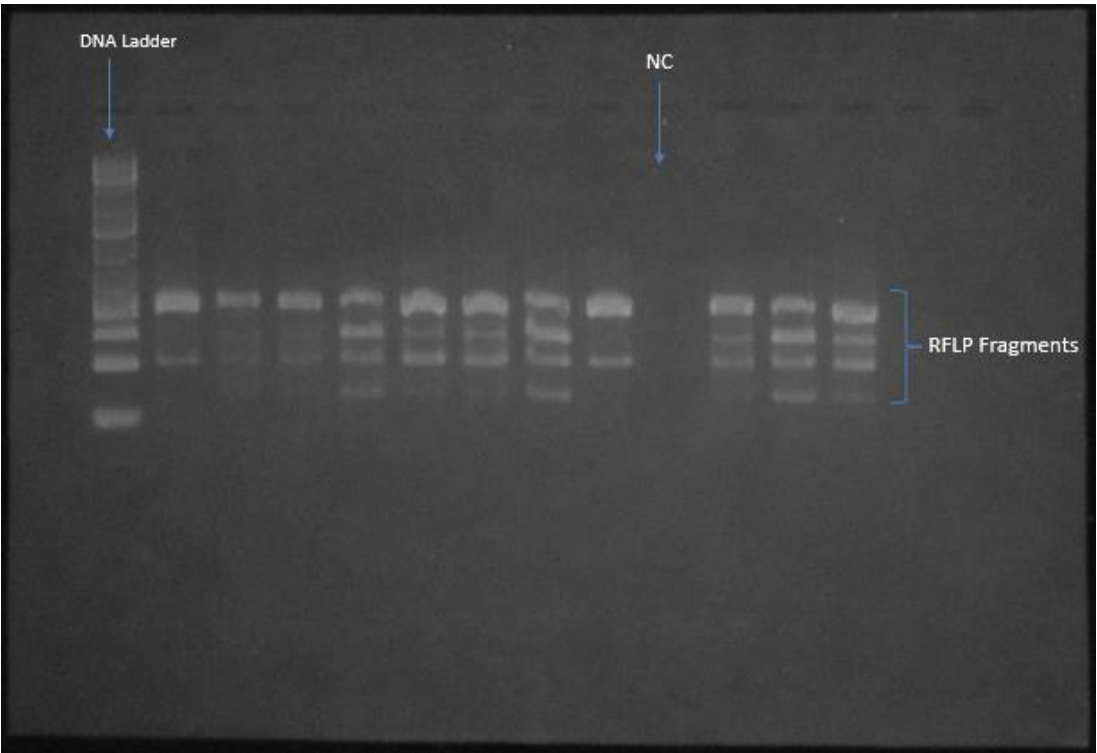

Figure 2. FUT2 RFLP Fragments on agarose gel

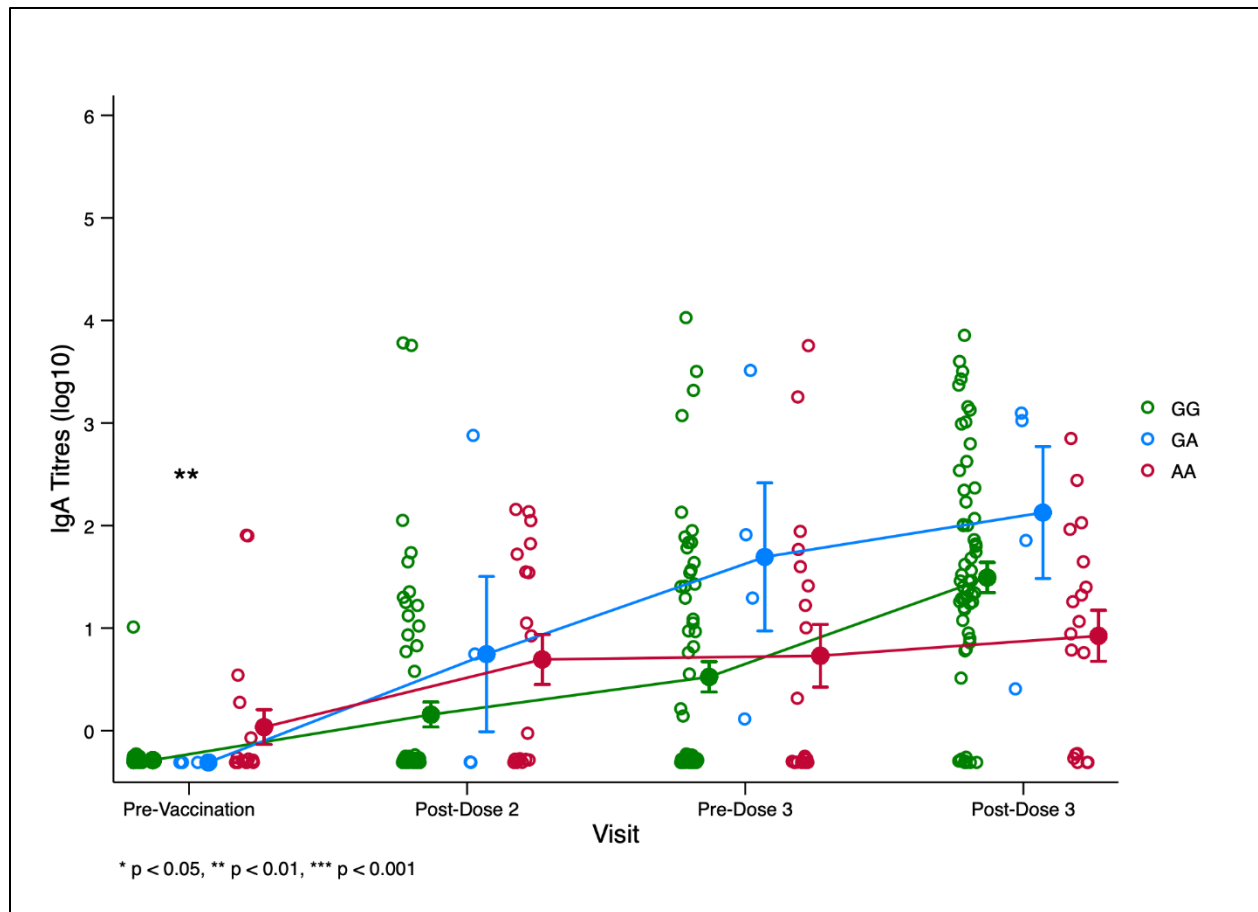

Figure 3c. Trend plot for infant RV-IgA titre kinetics for Lewis phenotype. The green and marron lines represent the trends of RV-IgA titres over time for the Lewis-null (Le-) and Lewis-positive (Le+) phenotypes respectively. \*\*\*  $p < 0.001$
